# Supplementary material for: Silk fibroin and hydroxyapatite segmented coating enhances graft ligamentization and osseointegration processes of the polyethylene terephthalate artificial ligament in vitro and in vivo
Source: Royal Society of Chemistry journal article supplement (doi:10.1039/c8tb01310a), 2018-01-01
Supplement: c8tb01310a1.pdf [file c8tb01310a1.pdf]

## **Supporting Information**

### **Silk fibroin and hydroxyapatite segmented coating enhances graft ligamentization and osseointegration processes of polyethylene terephthalate artificial ligament in vitro and in vivo**

Jiangyu Cai,<sup>a</sup> Fang Wan,<sup>a</sup> Qinglin Dong,<sup>b</sup> Jia Jiang,<sup>a</sup> Chengchong Ai,<sup>a</sup> Dandan Sheng,<sup>a</sup> Wenhe Jin,<sup>a</sup> Xingwang Liu,<sup>a</sup> Yunlong Zhi,<sup>a</sup> Siheng Wang,<sup>a</sup> Yaying Sun,<sup>a</sup> Jun Chen,<sup>a</sup> Zhengzhong Shao<sup>b</sup> and Shiyi Chen<sup>\*a</sup>

<sup>a</sup> Department of Sports Medicine, Huashan Hospital, Fudan University, 12 Middle Wulumuqi Road, Shanghai, 200040, People's Republic of China. E-mail: cshiyi@163.com; Fax: +86 21 6249 6020; Tel: +86 21 5288 8255

<sup>b</sup> State Key Laboratory of Molecular Engineering of Polymers, Laboratory of Advanced Materials, Department of Macromolecular Science, Fudan University, Shanghai, 200433, People's Republic of China

### Supplementary figures

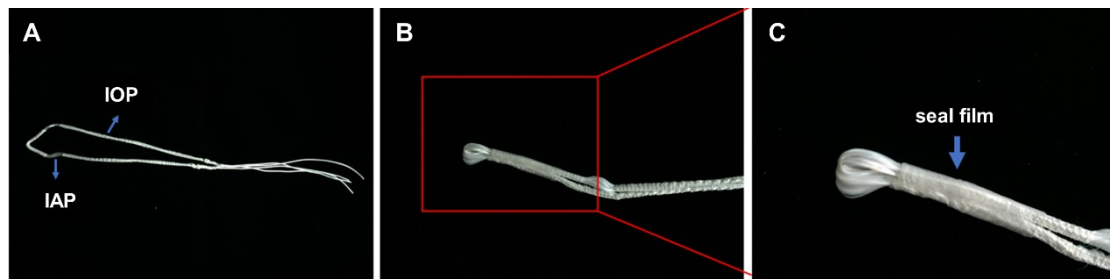

**Fig. S1** (A) The IOP and IAP of the PET artificial ligament. (B,C) The seal film was used to seal the IOP of the ligament to avoid exposing into the SF solution.

Abbreviations: IOP, intraosseous part; IAP, intra-articular part; PET, polyethylene terephthalate; SF, silk fibroin.

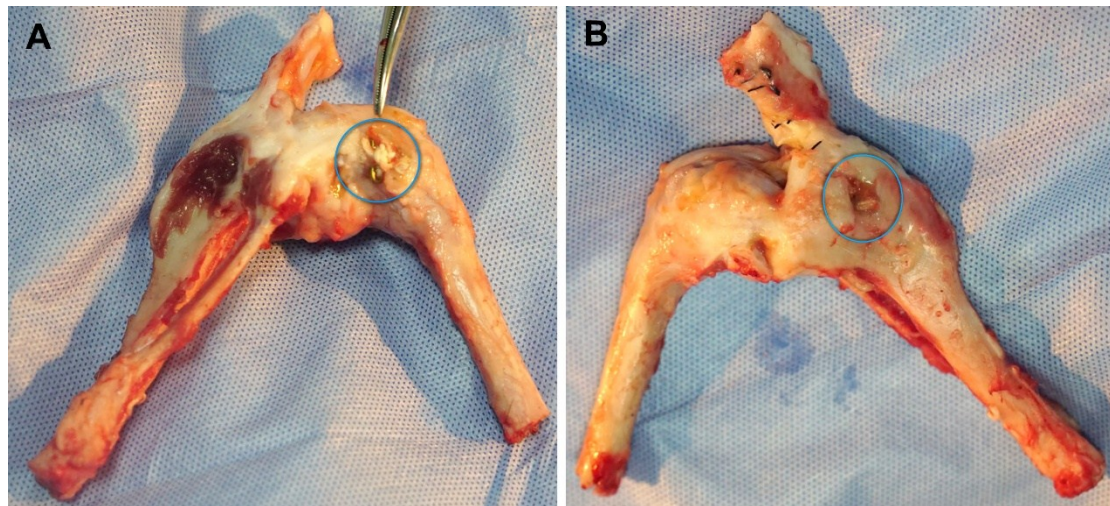

**Fig. S2** The fixation devices including button plate (A) and interference screw (B) were wrapped by the surrounding tissues after reconstruction surgery.
